# Supplementary material
Source: Elsevier journal article supplement (https://www.sciencedirect.com/science/article/pii/S2341192921001499)
Supplement: mmc1 [file S2341192921001499:mmc1.docx]

**ANEXO 1.**

**Traducción en sentido inverso y versión final de la escala de Ottawa CRM GRS. Versión en inglés**

**
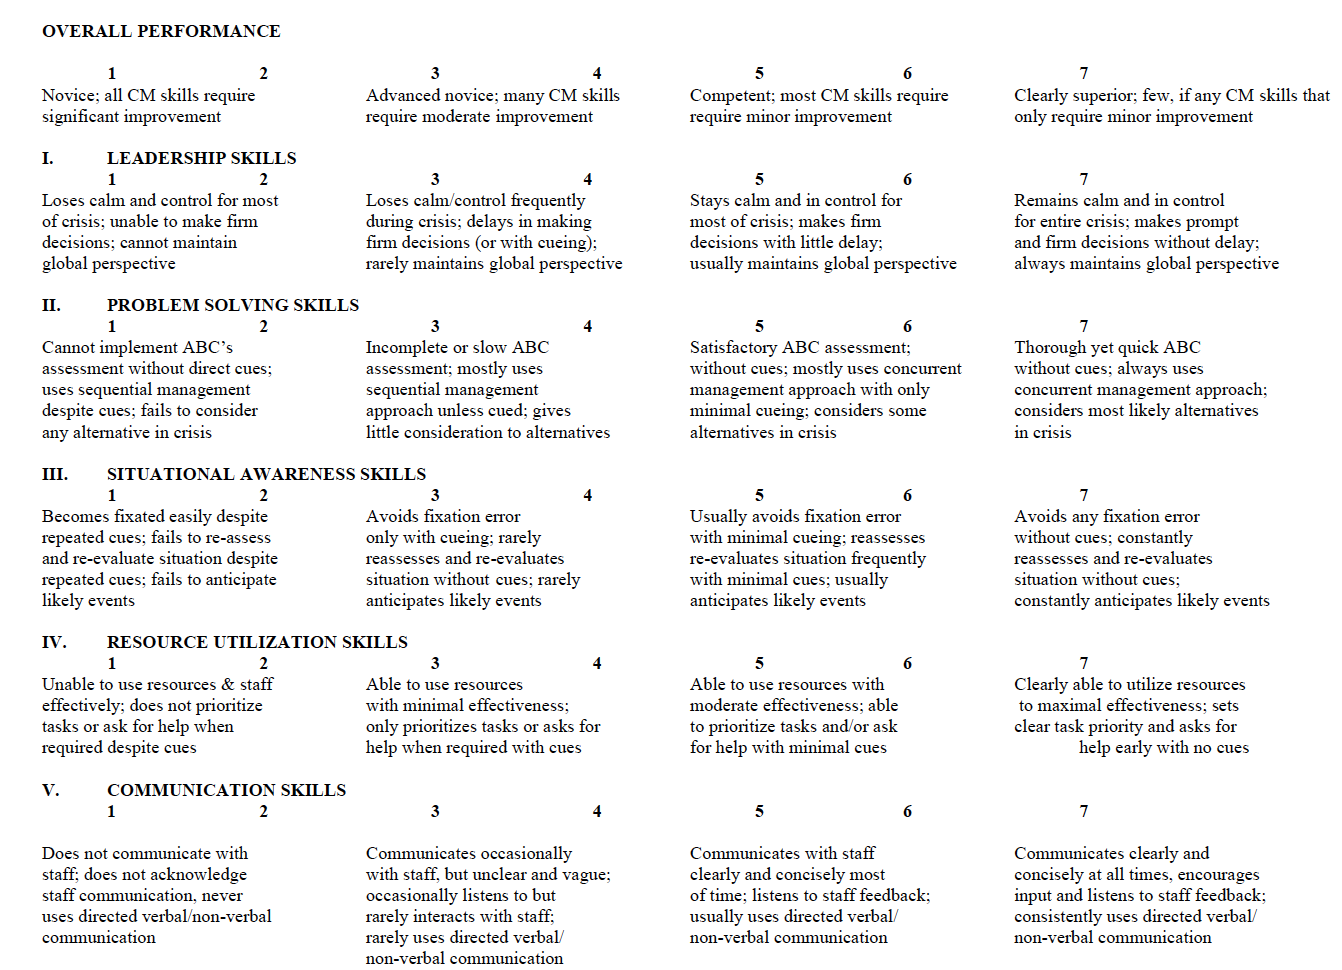
**

**ANEXO 2.**

**Traducción por traductores y versión final de la escala de Ottawa CRM GRS. Versión en español**

**
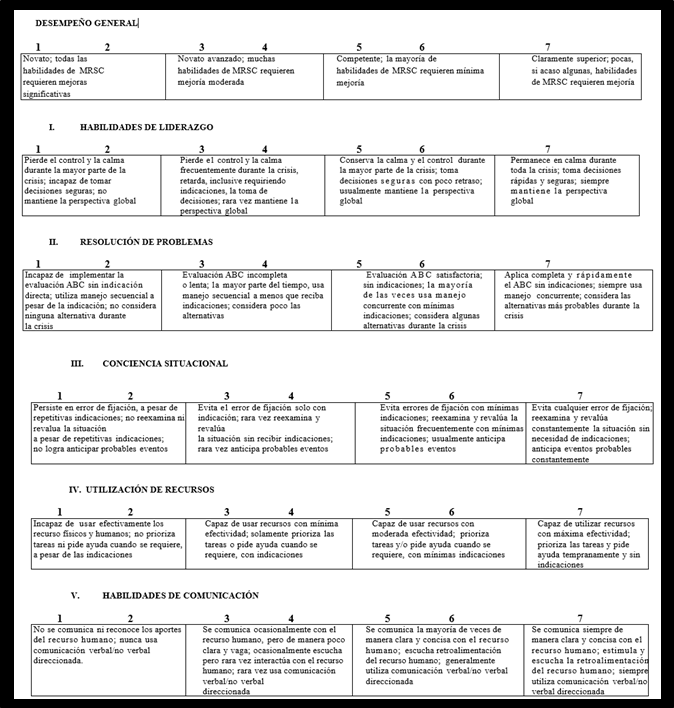
**
